# Supplementary material for: Visible light enables catalytic formation of weak chemical bonds with molecular hydrogen
Source: Springer Nature journal article supplement (doi:10.1038/s41557-021-00732-z), 2021-07-12
Supplement: 41557_2021_732_MOESM66_ESM.mol [file 41557_2021_732_MOESM66_ESM.mol]

nchem.20112650B-compIr5.mol
  ChemDraw05122122042D

 25 26  0  0  0  0  0  0  0  0999 V2000
   -0.8970    3.7916    0.0000 C   0  0  0  0  0  0  0  0  0  0  0  0
    0.8978    3.7912    0.0000 C   0  0  0  0  0  0  0  0  0  0  0  0
    1.4521    2.0840    0.0000 C   0  0  0  0  0  0  0  0  0  0  0  0
   -1.4521    2.0847    0.0000 C   0  0  0  0  0  0  0  0  0  0  0  0
   -0.0002    1.0294    0.0000 C   0  0  0  0  0  0  0  0  0  0  0  0
   -0.0001    1.8544    0.0000 C   0  5  0  0  0  0  0  0  0  0  0  0
    0.6675    2.3392    0.0000 C   0  0  0  0  0  0  0  0  0  0  0  0
    0.4127    3.1238    0.0000 C   0  0  0  0  0  0  0  0  0  0  0  0
   -0.4123    3.1240    0.0000 C   0  0  0  0  0  0  0  0  0  0  0  0
   -0.6674    2.3395    0.0000 C   0  0  0  0  0  0  0  0  0  0  0  0
    0.2572    0.7410    0.0000 Ir  0  3  0  0  0  0  0  0  0  0  0  0
   -0.7812   -0.9059    0.0000 C   0  0  0  0  0  0  0  0  0  0  0  0
   -0.7834   -0.0809    0.0000 C   0  0  0  0  0  0  0  0  0  0  0  0
   -0.0700    0.3334    0.0000 C   0  0  0  0  0  0  0  0  0  0  0  0
    0.6455   -0.0772    0.0000 C   0  0  0  0  0  0  0  0  0  0  0  0
    0.6477   -0.9022    0.0000 C   0  0  0  0  0  0  0  0  0  0  0  0
    1.3632   -1.3129    0.0000 C   0  0  0  0  0  0  0  0  0  0  0  0
    1.3654   -2.1379    0.0000 C   0  0  0  0  0  0  0  0  0  0  0  0
    0.6520   -2.5522    0.0000 C   0  0  0  0  0  0  0  0  0  0  0  0
    0.6541   -3.3772    0.0000 C   0  0  0  0  0  0  0  0  0  0  0  0
   -0.0593   -3.7916    0.0000 C   0  0  0  0  0  0  0  0  0  0  0  0
   -0.7748   -3.3809    0.0000 C   0  0  0  0  0  0  0  0  0  0  0  0
   -0.7770   -2.5559    0.0000 N   0  0  0  0  0  0  0  0  0  0  0  0
   -0.0636   -2.1416    0.0000 C   0  0  0  0  0  0  0  0  0  0  0  0
   -0.0657   -1.3166    0.0000 C   0  0  0  0  0  0  0  0  0  0  0  0
  9  1  1  0      
  8  2  1  0      
  7  3  1  0      
 10  4  1  0      
  6  5  1  0      
  6 10  1  0      
  7  6  1  0      
  8  7  2  0      
  9  8  1  0      
 10  9  2  0      
 25 12  1  0      
 13 12  2  0      
 14 13  1  0      
 15 14  2  0      
 16 15  1  0      
 17 16  1  0      
 25 16  2  0      
 18 17  2  0      
 19 18  1  0      
 20 19  1  0      
 24 19  2  0      
 21 20  2  0      
 22 21  1  0      
 23 22  2  0      
 24 23  1  0      
 25 24  1  0      
M  CHG  2   6  -1  11   1
M  END
